# Supplementary material
Source: publisher figshare collection journal article supplement (https://future-science-group.figshare.com/ndownloader/files/31361866)
Supplement: Supplementary file 1 [file 31361866]

| **A)** | **B)** |
| --- | --- |
| 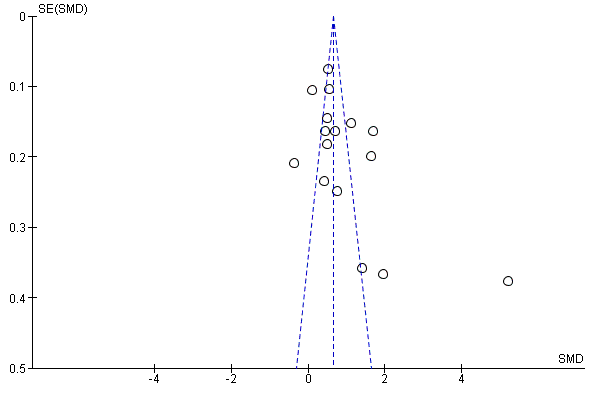 | 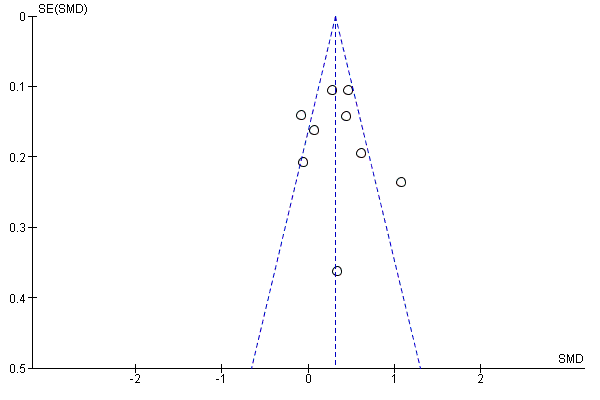 |
| **C)** |  |
| 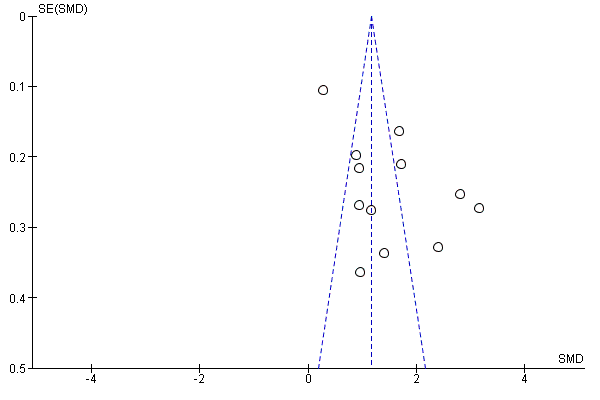 | |

**Supplementary Figure 1:** Funnel plot of biomarkers and Alzheimer’s Diseases **A).** Blood neurofilament light as diagnostic biomarker of Alzheimer’s Disease; **B).** Blood Total-tau as diagnostic biomarker of Alzheimer’s Disease; **C).** Blood Phosphorylated tau diagnostic biomarker of Alzheimer’s Disease.
